# Supplementary material for: Risk of all-cause and CHD mortality in women versus men with type 2 diabetes: a systematic review and meta-analysis
Source: PubMed Central journal article supplement (PMC6391911; doi:10.1530/eje-18-0792), 2019-01-21

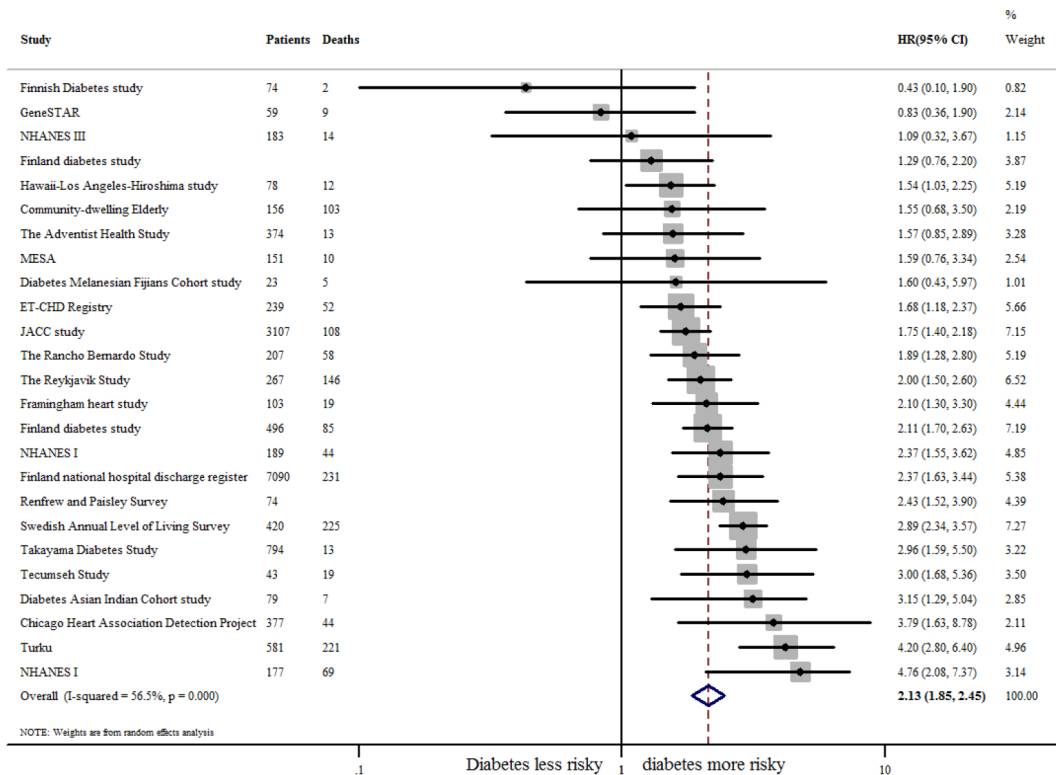

Supplement: supplementary_figure_6.pdf [file supplementary_figure_6.pdf]
